# Supplementary material
Source: publisher figshare collection journal article supplement (https://gsapubs.figshare.com/ndownloader/files/23306270)
Supplement: Supplementary file 1 [file 23306270]

## **Supplementary Information**

### **Doushantuo-type microfossils from latest Ediacaran phosphorites of northern Mongolia**

Ross P. Anderson, Francis A. Macdonald, David S. Jones, Sean McMahon, Derek E.G. Briggs

Email: [ross.anderson@yale.edu](mailto:ross.anderson@yale.edu)

## Methods

The Khesen fossils were examined in thin-section and by scanning electron microscopy following 20% acetic acid maceration. All materials are deposited in the Yale Peabody Museum of Natural History (YPM). Carbon isotope ratios of micro-drilled carbonate powders were measured following methods described in Macdonald et al. (2009).

## Biostratigraphy

### Khesen Gol

YPM 536746 and 536749 are at 0 and 3 m respectively in Fig. S1.

### Urandush Uul

YPM 536747 and 536748 are at 21 and 22 m respectively in Fig. S1.

|                                      | Khesen Gol |            | Urandush Uul |            |
|--------------------------------------|------------|------------|--------------|------------|
|                                      | YPM 536746 | YPM 536749 | YPM 536747   | YPM 536748 |
| <b>Cyanobacteria</b>                 |            |            |              |            |
| <i>Obruchevella delicata</i>         | R          |            |              |            |
| <i>Obruchevella magna</i>            |            |            | R            | R          |
| <i>Obruchevella parvissima</i>       |            |            |              | R          |
| <i>Obruchevella</i> sp.              |            |            |              | R          |
| <i>Siphonophycus</i> spp.            | C          | C          | C            | C          |
| <b>?Algae</b>                        |            |            |              |            |
| <i>Archaeophycus yunnanensis</i>     |            |            | R            |            |
| <b>Acritarchs</b>                    |            |            |              |            |
| <i>Appendisphaera grandis</i>        |            |            | R            |            |
| <i>Appendisphaera fragilis</i>       |            | R          |              | R          |
| <i>Appendisphaera tenuis</i>         |            |            | R            |            |
| <i>Cavaspina ?basiconica</i>         |            |            | R            |            |
| <i>Leiosphaeridia</i> spp.           | R          | R          | C            | C          |
| <i>Megasphaera</i> sp.               |            |            | C            | C          |
| <i>Variomargosphaeridium gracile</i> |            |            | C            | C          |
| <i>Variomargosphaeridium</i> sp.     |            |            |              | R          |

Table S1: Biostratigraphy of the upper Khesen Formation showing reported taxa from the four most diverse samples and their relative abundance within the assemblage. R = rare (isolated individuals, only a few specimens). C = common (10s of individuals). In the case of *Megasphaera* 10s of individuals are reported but only a few are preserved with enough fidelity to confidently interpret internal structures. YPM sample numbers are given for reference.

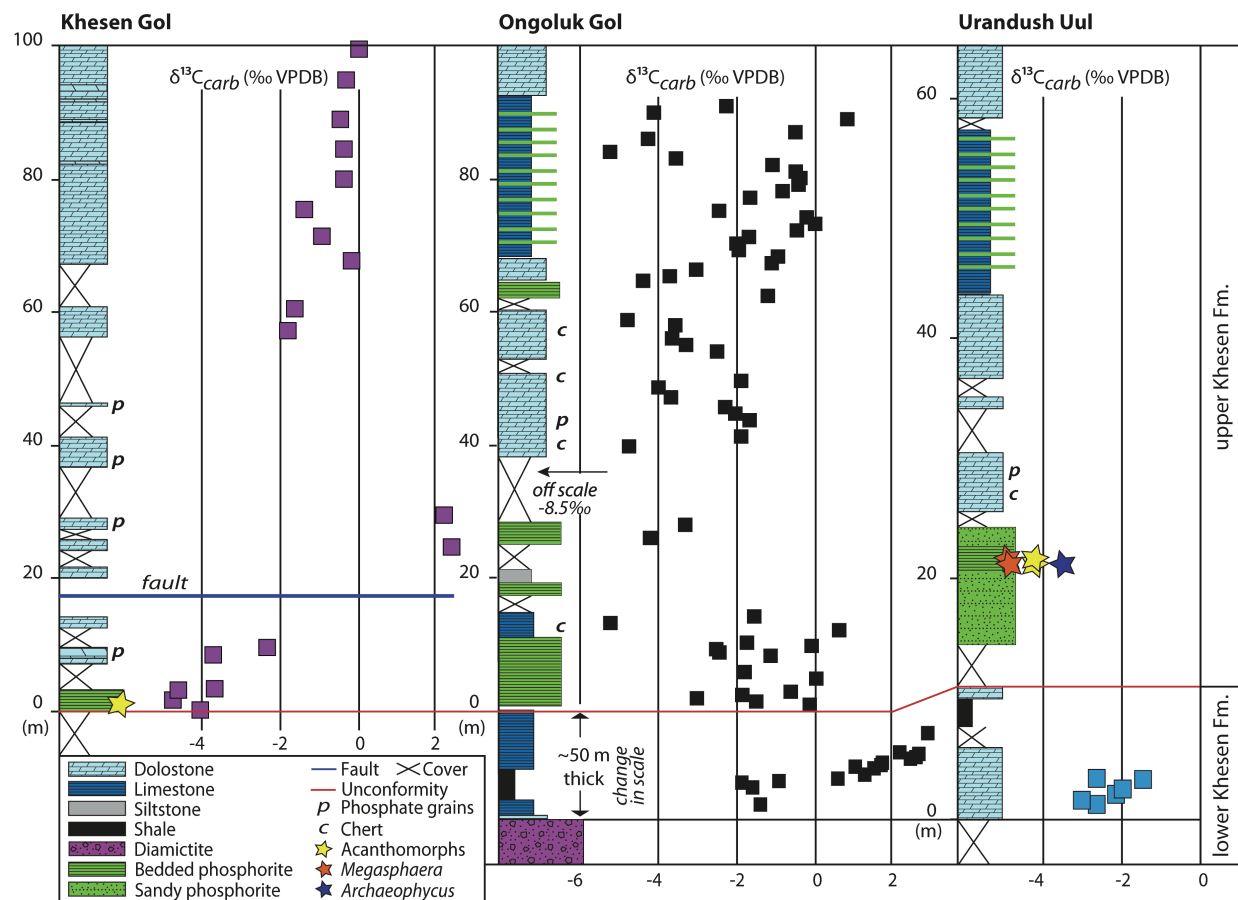

Figure S1: Expanded stratigraphy showing relationships between Khesen Gol, Ongoluk Gol, and Urandush Uul localities. See Figure 1 for locality information.

## References

Macdonald, F.A., Jones, D.S., and Schrag, D.P., 2009. Stratigraphic and tectonic implications of a newly discovered glacial diamictite-cap carbonate couplet in southwestern Mongolia: *Geology*, v. 37, p. 123–126, <https://doi.org/10.1130/G24797A.1>.
